# Supplementary material for: Rule-Based Modeling of Chronic Disease Epidemiology: Elderly Depression as an Illustration
Source: PLoS One. 2012 Aug 28;7(8):e41452. doi: 10.1371/journal.pone.0041452 (PMC3429481; doi:10.1371/journal.pone.0041452)
Supplement: Appendix S2 — Questionnaires as presented to the experts (FR). (XLS) [file pone.0041452.s002.xls]

## Sheet: Présentation
Votre profil
Age
Sexe (M/F)
Formation
Localisation / Institution
Emploi actuel / Situation Professionnelle
Années d'ancienneté dans cet emploi
Nombre de contacts avec des personnes de plus de 65 ans au cours de la semaine écoulée
Remarques éventuelles:

## Sheet: Cas non-dépressif
Cas d'une personne non-dépressive						0
	Pension	Veuvage	Déménagement	Déclin Fonctionnel	Pré-institutionalisation
Epoux / Epouse	0	0	0	0	0
Ami/Enfant	0	0	0	0	0
Prestataire de soin	0	0	0	0	0
Voisins	0	0	0	0	0
Pas de contact	0	0	0	0	0
	0	0	0	0	0

## Sheet: Cas dépressif
Cas d'une personne dépressive						0
	Pension	Veuvage	Déménagement	Déclin Fonctionnel	Pré-institutionalisation
Epoux / Epouse	0	0	0	0	0
Ami/Enfant	0	0	0	0	0
Prestataire de soin	0	0	0	0	0
Voisins	0	0	0	0	0
Pas de contact	0	0	0	0	0
	0	0	0	0	0

## Sheet: Explication(2)
	ALLEZ MAINTENANT A LA PAGE « IMPACT» EN CLIQUANT SUR L’ONGLET CORRESPONDANT EN DESSOUS DE CETTE PAGE.

## Sheet: Impact
Impact du contact sur l'état dépressif De la personne de plus de 65 ans						Non Valide
	Epoux / Epouse	Ami/enfant	Prestataire de soins	Voisin	Pas de contact
Négatif(-1)	0	0	0	0	0
Neutre(0)	0	0	0	0	0
Positif(+1)	0	0	0	0	0
	0	0	0	0	0
